# Supplementary material
Source: PubMed Central journal article supplement (PMC4837126)
Supplement: NIHMS678276-supplement-Supplemental_Digital_Content.pdf [file NIHMS678276-supplement-Supplemental_Digital_Content.pdf]

# Kaplan-Meier Infant Survival Estimates

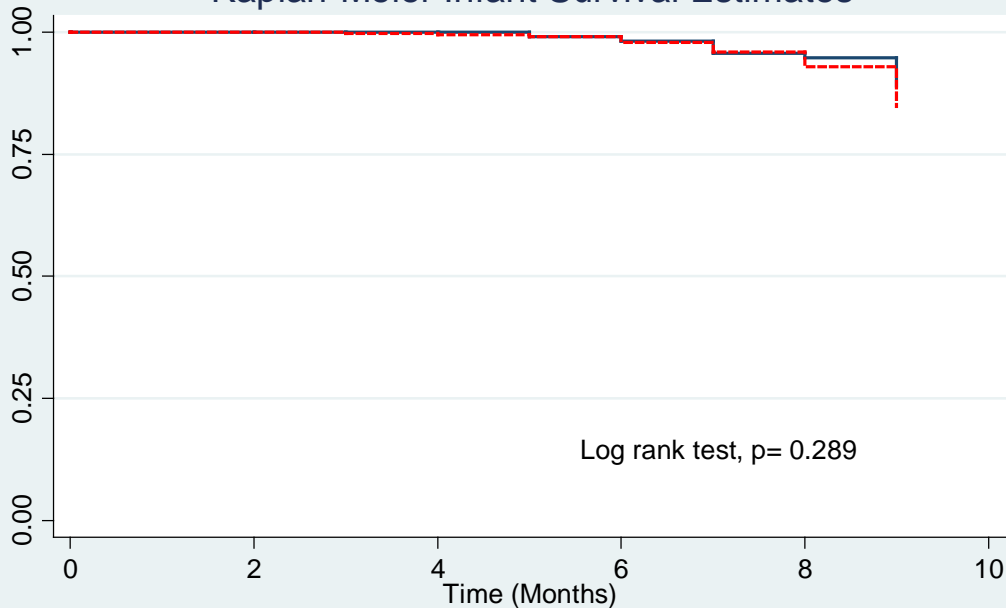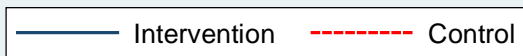

# Kaplan-Meier Infant HIV-Free Survival Estimates

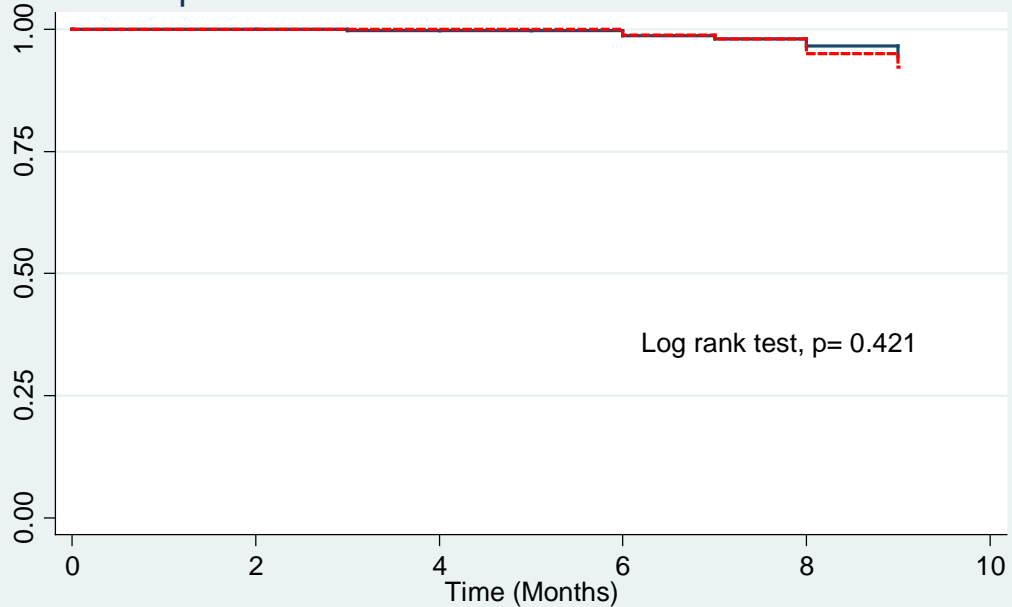

— Intervention    - - - - Control

## Supplemental Digital Content

### Kenyan National PMTCT Guidelines from 2007-2010

| Date        | Antepartum                             | Intrapartum                            | Postpartum                                           | Infant Prophylaxis                                                                                   |
|-------------|----------------------------------------|----------------------------------------|------------------------------------------------------|------------------------------------------------------------------------------------------------------|
| May 2007*   | AZT 300mg BD (from 28 weeks gestation) | AZT 600 mg<br>NVP 200 mg               |                                                      | NVP Syrup 2mg/kg within 72 hours of birth<br><br>AZT syrup 4 mg/kg BD for 4 weeks.                   |
| August 2010 | AZT 300mg BD (from 14 weeks gestation) | AZT 600 mg<br>3TC 300 mg<br>NVP 200 mg | AZT 600 mg qD x 1 week<br><br>3TC 300 mg qD x 1 week | NVP Syrup 2mg/kg within 72 hours of birth continued until one week after cessation of breastfeeding. |

AZT=Zidovudine, 3TC=Lamivudine, NVP=Nevirapine

\*SHAIP study protocol and power calculations based on 2007 PMTCT protocols
